# Supplementary material
Source: PubMed Central journal article supplement (PMC4713234)
Supplement: NIHMS748547-supplement-supp_figure_1.pdf [file NIHMS748547-supplement-supp_figure_1.pdf]

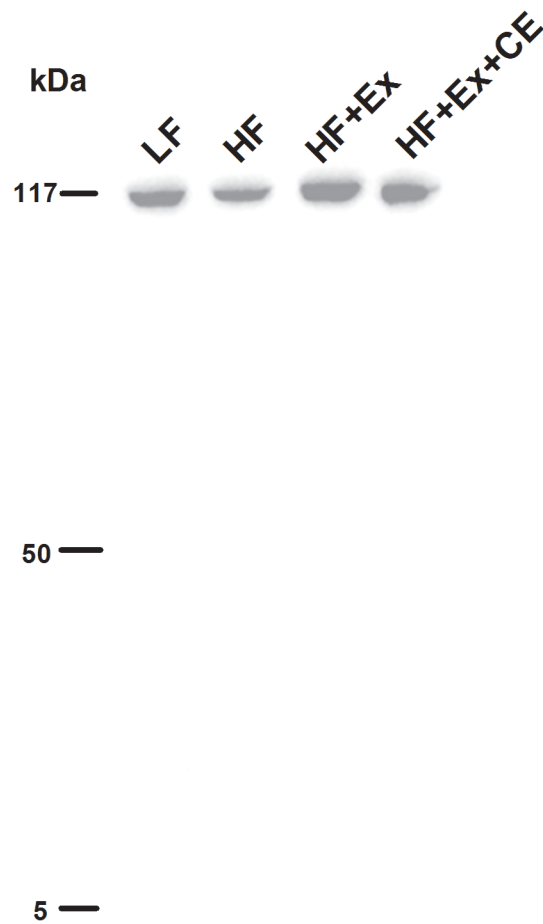

**Supplementary Figure S1. Antibody characterization for analysis of NNT in skeletal muscle.**

Protein from gastrocnemius muscle (10  $\mu$ g per lane) was separated by SDS-PAGE and analyzed for anti-NNT immunoreactivity. Low fat (LF); High fat (HF); High fat with exercise (HF+Ex); High fat with exercise with vitamin E and vitamin C (HF+Ex+CE). Since a single protein band of the predicted mass (114 kDa) was detected by western blot for these proteins, subsequent quantitation of NNT by dot blot.
