# Supplementary material
Source: PubMed Central journal article supplement (PMC4713234)
Supplement: NIHMS748547-supplement-supp_figure_2.pdf [file NIHMS748547-supplement-supp_figure_2.pdf]

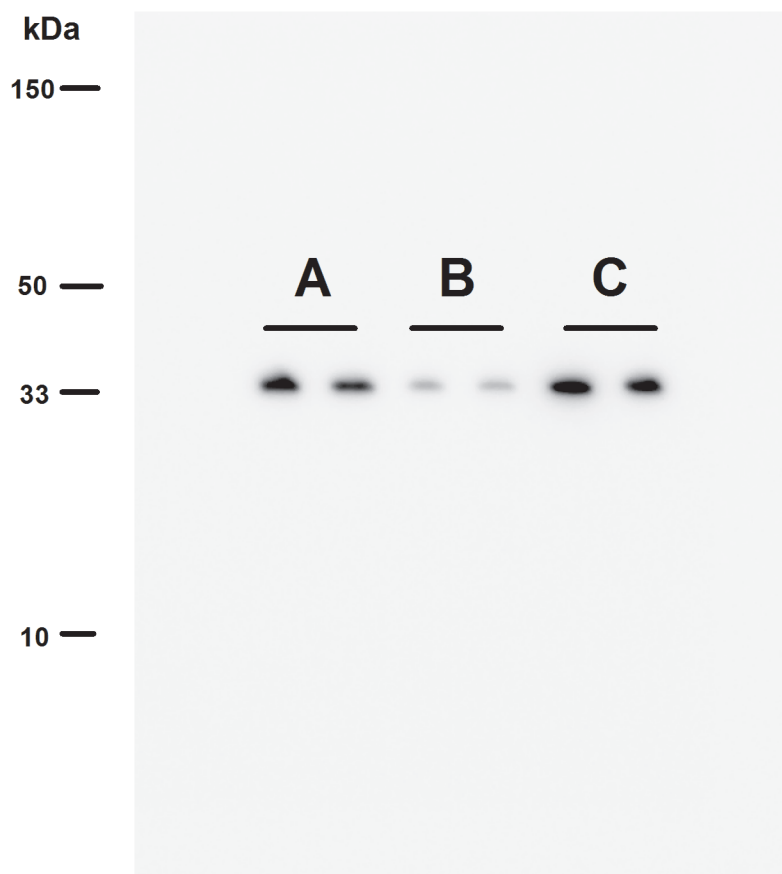

**Supplementary Figure S2. Antibody characterization for analysis of complex I NDUFA9 subunit in skeletal muscle.** Proteins (5  $\mu$ g per lane) from gastrocnemius (A) triceps (B) and soleus (C) of control rats were separated by SDS-PAGE and analyzed for anti-NDUFA9 immunoreactivity. Since a single protein band of the predicted mass (39 kDa) was detected by western blot for these proteins, subsequent quantitation of NDUFA9 by dot blot.
