# Supplementary material
Source: PubMed Central journal article supplement (PMC4713234)
Supplement: NIHMS748547-supplement-supp_figure_3.pdf [file NIHMS748547-supplement-supp_figure_3.pdf]

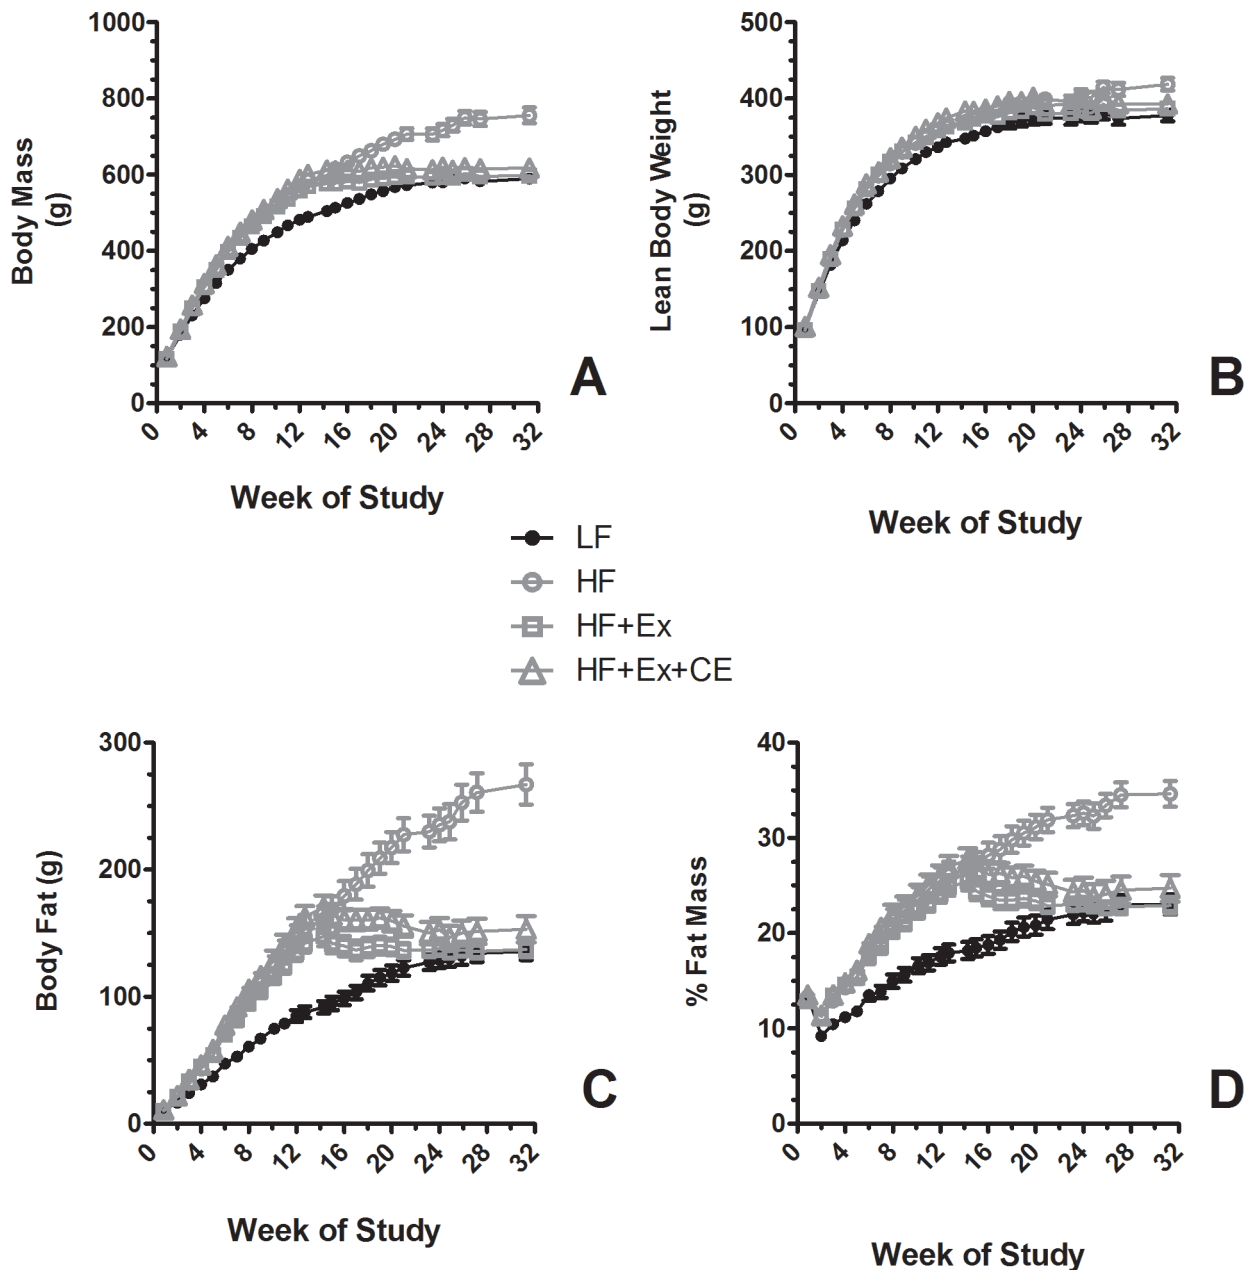

**Supplementary Figure S3.** Body composition characteristics for the entire study. (A) Total body mass for the animal groups throughout the study. Animals were weighed weekly. Body composition characteristics (B) lean body mass, (C) body fat mass, and (D) % fat mass were determined by magnetic resonance imaging. Data shown are the mean  $\pm$  standard of the mean (SEM;  $n = 13$  or  $14$ ). SEM is shown for clarity of the figures. Low fat (LF); High fat (HF); High fat with exercise (HF+Ex); High fat with exercise with vitamin E and vitamin C (HF+Ex+CE). Body composition was not determined for the two week period between the OGTT and the final body composition analysis at the end of the study.
